# Supplementary material
Source: ML conference proceedings conference paper supplement (https://openreview.net/forum?id=xzmqxHdZAwO)
Supplement: supplementary_material [file attachment]

## APPENDIX

### Anonymous authors

Paper under double-blind review

## A DATASET

**MVTec AD** is the most popular dataset for industrial image anomaly detection (Bergmann et al. (2019)), which consists of 15 categories of items, including a total of 3629 normal images as a training set, and a collection of 1725 normal images and abnormal images as a test set. All images have a resolution between  $700 \times 700$  and  $1024 \times 1024$  pixels.

**MPDD** is a more challenging AD dataset containing 6 classes of metal parts (Jezek et al. (2021)). The images are taken in different spatial directions, and distances, and under the condition of non-uniform background, so it is more challenging. The training set contains 888 normal images, and the test set contains 176 normal images and 282 abnormal images. The resolution of all images is  $1024 \times 1024$  pixels.

**MVTEC LOCO AD** adds logical abnormal images outside the structural class abnormal image (Bergmann et al. (2022)). The dataset contains 1,772 normal images as a training set and 304 normal images are used as a validation set. The test set contains 575 normal images, 432 structural abnormal images, and 561 logic abnormal images. Due to the different calculation methods of logic abnormal detection metric, we abandon the logical abnormal image of the test concentration, retaining the remaining 575 normal images and 432 structural abnormal images as a test set for experiments. Each image is 850 to 1600 pixels in height and 800 to 1700 pixels wide.

## B EXPERIMENT RESULTS

Table 1: Results of anomaly detection. Setting: New Fewshot Setting, K (number of shot)=1, Dataset: MVTec, Sampling Ratio: 0.01, Metrics: Image AUROC. The number of shot for RegAD is 2. The data for PaDiM and PatchCore-10, PatchCore-25 are from Roth et al. (2022).

| Category   | Aug.(R)     | GraphCore   | CFA         | SPADE | PaDiM | STPM  | RD4AD | PatchCore-1 | PatchCore-10 | PatchCore-25 | RegAD |
|------------|-------------|-------------|-------------|-------|-------|-------|-------|-------------|--------------|--------------|-------|
| Bottle     | 99.7        | <b>99.8</b> | 96.7        | 95.2  | -     | 93.2  | 91.2  | 96.5        | -            | -            | -     |
| Cable      | 90.1        | <b>91.1</b> | 65.4        | 60.1  | -     | 59.8  | 58.3  | 65.5        | -            | -            | -     |
| Capsule    | 64.7        | <b>72.1</b> | 50.2        | 45.6  | -     | 43.2  | 44.7  | 49.8        | -            | -            | -     |
| Carpet     | <b>99.3</b> | <b>99.3</b> | 97.1        | 93.2  | -     | 90.5  | 92.5  | 97.2        | -            | -            | -     |
| Grid       | 70.8        | <b>80.9</b> | 79.2        | 75.1  | -     | 71.2  | 74.3  | 78.9        | -            | -            | -     |
| Hazelnut   | 97.4        | <b>98.5</b> | 98.1        | 95.0  | -     | 90.3  | 93.2  | 98.0        | -            | -            | -     |
| Leather    | <b>100</b>  | <b>100</b>  | <b>100</b>  | 97.2  | -     | 95.1  | 96.5  | <b>100</b>  | -            | -            | -     |
| Meta Nut   | 77.0        | <b>92.5</b> | 66.1        | 60.2  | -     | 58.2  | 63.4  | 65.6        | -            | -            | -     |
| Pill       | 81.0        | 81.2        | 66.3        | 59.7  | -     | 57.3  | 62.4  | 65.1        | -            | -            | -     |
| Screw      | 57.4        | <b>57.9</b> | 55.9        | 49.6  | -     | 51.2  | 53.5  | 54.8        | -            | -            | -     |
| Tile       | <b>99.9</b> | 99.2        | 99.8        | 89.5  | -     | 90.2  | 88.7  | 99.5        | -            | -            | -     |
| Toothbrush | 84.4        | 85.2        | <b>86.7</b> | 78.5  | -     | 75.2  | 77.8  | 85.8        | -            | -            | -     |
| Transistor | 94.5        | <b>96.2</b> | 71.5        | 50.5  | -     | 83.2  | 77.5  | 70.5        | -            | -            | -     |
| Wood       | 97.0        | 97.3        | 98.1        | 49.5  | -     | 95.4  | 93.5  | 98.9        | -            | -            | -     |
| Zipper     | 97.4        | <b>97.5</b> | 50.3        | 48.5  | -     | 45.2  | 48.6  | 51.2        | -            | -            | -     |
| Average    | 87.4        | <b>89.9</b> | 78.75       | 69.83 | 76.1  | 69.70 | 74.4  | 78.5        | 83.40        | 84.10        | 82.4  |

## C ABLATION STADIES

### REFERENCES

Paul Bergmann, Michael Fauser, David Sattlegger, and Carsten Steger. Mvtec ad — a comprehensive real-world dataset for unsupervised anomaly detection. *2019 IEEE/CVF Conference on Computer Vision and Pattern Recognition (CVPR)*, pp. 9584–9592, 2019.

Table 2: Setting: Ours Fewshot Setting, K (number of shot)=1, Dataset: MVTec, Sampling Ratio: 0.01, Metrics: Pixel AUROC. The number of shot for RegAD is 2. The data for PaDiM and PatchCore-10, PatchCore-25 are from Roth et al. (2022).

| Category   | Aug.(R)     | GraphCore    | CFA   | SPADE | PaDiM | STPM  | RD4AD | PatchCore-1 | PatchCore-10 | PatchCore-25 | RegAD |
|------------|-------------|--------------|-------|-------|-------|-------|-------|-------------|--------------|--------------|-------|
| Bottle     | 98.5        | <b>99.8</b>  | 93.2  | 85.2  | -     | 84.3  | 81.7  | 93.0        | -            | -            | -     |
| Cable      | 95.1        | <b>96.2</b>  | 88.2  | 78.2  | -     | 50.9  | 64.8  | 87.0        | -            | -            | -     |
| Capsule    | 97.7        | <b>98.1</b>  | 85.6  | 79.2  | -     | 49.2  | 77.9  | 87.7        | -            | -            | -     |
| Carpet     | 99.1        | <b>99.3</b>  | 97.5  | 95.2  | -     | 60.5  | 72.5  | 98.8        | -            | -            | -     |
| Grid       | 70.5        | 76.9         | 81.3  | 75.6  | -     | 61.2  | 74.3  | <b>84.1</b> | -            | -            | -     |
| Hazelnut   | 97.1        | <b>98.5</b>  | 98.1  | 88.2  | -     | 73.3  | 63.2  | 97.5        | -            | -            | -     |
| Leather    | 99.3        | <b>99.5</b>  | 99.2  | 88.3  | -     | 75.1  | 86.5  | 99.2        | -            | -            | -     |
| Meta Nut   | 93.2        | 92.5         | 89.5  | 58.5  | -     | 51.1  | 68.7  | 90.1        | -            | -            | -     |
| Pill       | 95.7        | <b>96.2</b>  | 91.2  | 54.2  | -     | 49.3  | 65.6  | 90.4        | -            | -            | -     |
| Screw      | 92.0        | 93.4         | 96.5  | 69.6  | -     | 51.2  | 59.7  | <b>95.8</b> | -            | -            | -     |
| Tile       | 95.8        | <b>96.8</b>  | 81.5  | 81.5  | -     | 57.2  | 88.7  | 82.7        | -            | -            | -     |
| Toothbrush | 97.9        | <b>98.5</b>  | 93.8  | 75.5  | -     | 65.2  | 77.8  | 93.0        | -            | -            | -     |
| Transistor | 93.6        | <b>96.2</b>  | 79.5  | 73.5  | -     | 43.2  | 77.5  | 78.8        | -            | -            | -     |
| Wood       | 93.1        | <b>94.3</b>  | 91.8  | 89.5  | -     | 45.4  | 93.5  | 90.7        | -            | -            | -     |
| Zipper     | <b>98.5</b> | 97.5         | 93.2  | 93.5  | -     | 55.2  | 48.6  | 94.0        | -            | -            | -     |
| Average    | 94.47       | <b>95.60</b> | 90.67 | 79.07 | 88.20 | 58.15 | 69.03 | 90.85       | 92.00        | 92.40        | -     |

Table 3: Setting: Ours Fewshot Setting, K (number of shot)=2, Dataset: MVTec, Sampling Ratio: 0.01, Metrics: Image AUROC. The data for PaDiM and PatchCore-10, PatchCore-25 are from Roth et al. (2022).

| Category   | Aug.(R)     | GraphCore    | CFA        | SPADE | PaDiM | STPM  | RD4AD | PatchCore-1 | PatchCore-10 | PatchCore-25 | RegAD       |
|------------|-------------|--------------|------------|-------|-------|-------|-------|-------------|--------------|--------------|-------------|
| Bottle     | 99.7        | <b>99.8</b>  | 93.7       | 95.7  | -     | 93.8  | 91.2  | 99.7        | -            | -            | 99.4        |
| Cable      | 94.7        | <b>95.2</b>  | 89.3       | 60.4  | -     | 60.2  | 65.3  | 94.9        | -            | -            | 65.1        |
| Capsule    | 66.5        | <b>73.2</b>  | 53.4       | 48.7  | -     | 45.2  | 50.5  | 67.2        | -            | -            | 67.5        |
| Carpet     | <b>99.4</b> | <b>99.4</b>  | 97.6       | 92.1  | -     | 90.8  | 92.8  | 99.1        | -            | -            | 96.5        |
| Grid       | 75.7        | 81.5         | 80.4       | 75.8  | -     | 72.6  | 75.2  | 61.7        | -            | -            | <b>84.0</b> |
| Hazelnut   | <b>99.7</b> | 99.5         | 99.4       | 95.2  | -     | 90.3  | 93.4  | 93.5        | -            | -            | 96.0        |
| Leather    | <b>100</b>  | <b>100</b>   | <b>100</b> | 97.9  | -     | 95.8  | 96.7  | <b>100</b>  | -            | -            | 99.4        |
| Meta Nut   | 95.0        | <b>96.3</b>  | 68.6       | 61.3  | -     | 59.4  | 63.4  | 92.0        | -            | -            | 91.4        |
| Pill       | 87.8        | <b>88.6</b>  | 67.4       | 60.2  | -     | 58.7  | 62.8  | 87.4        | -            | -            | 81.3        |
| Screw      | 63.6        | <b>65.7</b>  | 58.2       | 51.3  | -     | 51.9  | 54.3  | 48.3        | -            | -            | 52.5        |
| Tile       | <b>100</b>  | <b>100</b>   | 99.8       | 90.2  | -     | 91.4  | 88.9  | <b>100</b>  | -            | -            | 94.3        |
| Toothbrush | 83.6        | <b>87.3</b>  | 86.9       | 80.2  | -     | 76.5  | 77.1  | 83.9        | -            | -            | 86.6        |
| Transistor | 96.3        | <b>97.1</b>  | 72.5       | 51.6  | -     | 82.4  | 78.1  | 96.9        | -            | -            | 86.0        |
| Wood       | 97.1        | 97.5         | 98.2       | 50.3  | -     | 95.8  | 93.7  | 97.2        | -            | -            | <b>99.2</b> |
| Zipper     | 96.9        | <b>97.5</b>  | 50.5       | 49.4  | -     | 47.6  | 49.5  | 95.3        | -            | -            | 86.3        |
| Average    | 90.40       | <b>91.91</b> | 81.06      | 70.69 | 78.90 | 74.16 | 75.53 | 87.81       | 86.40        | 87.20        | 85.70       |

Paul Bergmann, Kilian Batzner, Michael Fauser, David Sattlegger, and Carsten Steger. Beyond dents and scratches: Logical constraints in unsupervised anomaly detection and localization. *International Journal of Computer Vision*, 130(4):947–969, 2022.

Stepan Jezek, Martin Jonak, Radim Burget, Pavel Dvorak, and Milos Skotak. Deep learning-based defect detection of metal parts: evaluating current methods in complex conditions. In *2021 13th International Congress on Ultra Modern Telecommunications and Control Systems and Workshops (ICUMT)*, pp. 66–71. IEEE, 2021.

Karsten Roth, Latha Pemula, Joaquin Zepeda, Bernhard Schölkopf, Thomas Brox, and Peter Gehler. Towards total recall in industrial anomaly detection. In *Proceedings of the IEEE/CVF Conference on Computer Vision and Pattern Recognition*, pp. 14318–14328, 2022.

Table 4: Setting: Ours Fewshot Setting, K (number of shot)=2, Dataset: MVTec, Sampling Ratio: 0.01, Metrics: Pixel AUROC. The data for PaDiM and PatchCore-10, PatchCore-25 are from Roth et al. (2022).

| Category   | Aug.(R) | GraphCore    | CFA         | SPADE | PaDiM | STPM  | RD4AD | PatchCore-1 | PatchCore-10 | PatchCore-25 | RegAD |
|------------|---------|--------------|-------------|-------|-------|-------|-------|-------------|--------------|--------------|-------|
| Bottle     | 98.6    | <b>99.8</b>  | 93.5        | 86.8  | -     | 84.6  | 81.7  | 98.5        | -            | -            | 98.0  |
| Cable      | 96.2    | 96.3         | 88.9        | 78.6  | -     | 51.6  | 65.4  | <b>97.8</b> | -            | -            | 91.7  |
| Capsule    | 97.7    | <b>97.8</b>  | 85.9        | 79.8  | -     | 59.2  | 78.2  | 97.7        | -            | -            | 97.3  |
| Carpet     | 99.1    | <b>99.6</b>  | 97.9        | 95.6  | -     | 60.5  | 74.2  | 99.0        | -            | -            | 98.9  |
| Grid       | 79.8    | 80.6         | <b>81.4</b> | 75.9  | -     | 61.2  | 76.3  | 67.5        | -            | -            | 77.4  |
| Hazelnut   | 97.9    | <b>98.2</b>  | 98.2        | 88.9  | -     | 74.5  | 64.8  | 96.4        | -            | -            | 98.1  |
| Leather    | 99.3    | <b>99.4</b>  | 99.3        | 89.2  | -     | 75.2  | 86.5  | 99.3        | -            | -            | 98.0  |
| Meta Nut   | 96.8    | <b>98.1</b>  | 89.7        | 59.5  | -     | 51.1  | 68.9  | 97.1        | -            | -            | 96.9  |
| Pill       | 93.9    | 94.1         | 91.5        | 57.2  | -     | 49.9  | 70.2  | <b>96.8</b> | -            | -            | 93.6  |
| Screw      | 96.0    | 96.5         | <b>96.7</b> | 70.2  | -     | 51.8  | 60.8  | 90.8        | -            | -            | 94.4  |
| Tile       | 99.3    | <b>96.8</b>  | 81.8        | 82.3  | -     | 58.2  | 59.2  | 96.0        | -            | -            | 94.3  |
| Toothbrush | 98.2    | <b>98.6</b>  | 93.9        | 76.8  | -     | 66.3  | 78.3  | 98.2        | -            | -            | 98.2  |
| Transistor | 94.1    | <b>99.2</b>  | 80.3        | 73.6  | -     | 47.5  | 67.8  | 95.0        | -            | -            | 93.4  |
| Wood       | 98.4    | <b>99.5</b>  | 92.4        | 89.7  | -     | 48.4  | 93.8  | 93.0        | -            | -            | 93.5  |
| Zipper     | 99.0    | <b>99.3</b>  | 94.1        | 93.7  | -     | 56.3  | 51.2  | 98.2        | -            | -            | 95.1  |
| Average    | 96.29   | <b>96.92</b> | 91.03       | 79.85 | 90.50 | 59.75 | 71.82 | 94.75       | 93.10        | 93.30        | 94.59 |

Table 5: Setting: New Fewshot Setting, K (number of shot)=4, Dataset: MVTec, Sampling Ratio: 0.01, Metrics: Image AUROC

| Category   | Aug.(R)     | GraphCore    | CFA         | SPADE | STPM  | RD4AD | PatchCore   | RegAD       |
|------------|-------------|--------------|-------------|-------|-------|-------|-------------|-------------|
| Bottle     | 99.7        | <b>99.8</b>  | 94.2        | 95.8  | 93.9  | 92.1  | 99.6        | 99.4        |
| Cable      | 94.1        | 95.2         | 91.2        | 61.3  | 61.3  | 68.4  | <b>97.4</b> | 76.1        |
| Capsule    | 66.2        | <b>74.5</b>  | 56.2        | 48.7  | 47.4  | 51.7  | 66.3        | 72.4        |
| Carpet     | <b>99.6</b> | 99.4         | 97.6        | 92.5  | 91.5  | 93.2  | 99.0        | 97.9        |
| Grid       | 77.9        | 81.6         | 81.5        | 76.2  | 75.3  | 76.4  | 63.0        | <b>91.2</b> |
| Hazelnut   | <b>99.9</b> | 99.5         | 99.4        | 95.6  | 91.4  | 93.8  | 92.8        | 95.8        |
| Leather    | <b>100</b>  | <b>100</b>   | <b>100</b>  | 98.2  | 96.9  | 96.8  | <b>100</b>  | <b>100</b>  |
| Meta Nut   | 95.9        | <b>96.2</b>  | 91.3        | 62.5  | 60.8  | 65.3  | 94.7        | 94.6        |
| Pill       | <b>89.3</b> | 88.2         | 85.6        | 61.8  | 61.3  | 62.8  | 89.0        | 80.8        |
| Screw      | 63.9        | <b>68.9</b>  | 49.2        | 52.9  | 52.8  | 55.7  | 54.1        | 56.6        |
| Tile       | <b>100</b>  | <b>100</b>   | 99.8        | 91.3  | 90.4  | 90.8  | 100         | 95.5        |
| Toothbrush | 94.4        | <b>95.2</b>  | 87.2        | 81.7  | 80.4  | 76.7  | <b>95.2</b> | 90.9        |
| Transistor | 98.5        | <b>99.2</b>  | 95.8        | 52.5  | 82.4  | 79.3  | 98.4        | 85.2        |
| Wood       | 97.4        | 97.9         | <b>98.6</b> | 51.4  | 95.8  | 94.2  | 97.4        | <b>98.6</b> |
| Zipper     | 96.9        | <b>98.2</b>  | 94.3        | 52.2  | 47.6  | 56.7  | 95.5        | 88.5        |
| Average    | 92.22       | <b>92.92</b> | 84.97       | 71.64 | 74.77 | 76.93 | 89.49       | 88.23       |

Table 6: Setting: New Fewshot Setting, K (number of shot)=4, Dataset: MVTec, Sampling Ratio: 0.01, Metrics: Pixel AUROC

| Category   | Aug.(R) | GraphCore    | CFA   | SPADE | STPM  | RD4AD | PatchCore   | RegAD       |
|------------|---------|--------------|-------|-------|-------|-------|-------------|-------------|
| Bottle     | 98.6    | <b>99.8</b>  | 93.6  | 86.9  | 84.9  | 81.8  | 98.6        | 98.4        |
| Cable      | 96.6    | 96.9         | 89.1  | 78.7  | 52.2  | 66.2  | <b>97.9</b> | 92.7        |
| Capsule    | 97.7    | <b>97.9</b>  | 86.2  | 80.1  | 59.3  | 78.4  | 97.7        | 97.6        |
| Carpet     | 99.1    | <b>99.6</b>  | 98.2  | 95.0  | 60.6  | 74.8  | 99.0        | 98.9        |
| Grid       | 81.9    | 82.3         | 82.5  | 76.1  | 61.8  | 76.9  | 70.6        | <b>85.7</b> |
| Hazelnut   | 98.3    | <b>99.1</b>  | 98.5  | 89.1  | 74.9  | 65.2  | 97.0        | 98.0        |
| Leather    | 99.3    | <b>99.6</b>  | 99.3  | 89.3  | 75.3  | 86.7  | 96.9        | 99.1        |
| Meta Nut   | 96.8    | <b>98.1</b>  | 89.9  | 60.2  | 51.8  | 69.2  | 97.0        | 97.8        |
| Pill       | 97.0    | <b>97.5</b>  | 91.6  | 58.2  | 50.6  | 70.4  | 96.9        | 97.4        |
| Screw      | 93.8    | <b>96.5</b>  | 96.8  | 71.3  | 51.9  | 60.9  | 92.1        | 95.0        |
| Tile       | 95.7    | <b>96.7</b>  | 82.3  | 82.4  | 58.5  | 59.5  | 96.0        | 94.9        |
| Toothbrush | 98.8    | <b>98.9</b>  | 94.2  | 76.9  | 66.9  | 78.9  | 98.8        | 98.5        |
| Transistor | 94.1    | <b>99.3</b>  | 80.5  | 74.2  | 57.5  | 67.9  | 95.0        | 93.8        |
| Wood       | 93.2    | <b>99.5</b>  | 92.6  | 90.4  | 48.9  | 94.2  | 93.1        | 94.7        |
| Zipper     | 98.4    | <b>99.3</b>  | 94.8  | 93.8  | 56.4  | 52.3  | 98.3        | 94.0        |
| Average    | 95.95   | <b>97.40</b> | 91.34 | 80.17 | 60.77 | 72.22 | 94.99       | 95.77       |

Table 7: Setting: New Fewshot Setting, K (number of shot)=8, Dataset: MVTec, Sampling Ratio: 0.01, Metrics: Image AUROC

| Category   | Aug.(R)     | GraphCore    | CFA        | SPADE | STPM  | RD4AD | PatchCore   | RegAD       |
|------------|-------------|--------------|------------|-------|-------|-------|-------------|-------------|
| Bottle     | <b>100</b>  | 99.8         | 95.1       | 95.9  | 94.1  | 92.8  | 99.6        | 99.8        |
| Cable      | 94.1        | 95.2         | 91.8       | 63.5  | 62.6  | 69.2  | <b>97.4</b> | 80.6        |
| Capsule    | 89.7        | <b>90.5</b>  | 69.5       | 58.9  | 57.8  | 58.5  | 85.3        | 76.3        |
| Carpet     | 98.5        | <b>99.5</b>  | 97.6       | 92.7  | 91.6  | 93.8  | 99.0        | 98.5        |
| Grid       | <b>92.7</b> | 92.3         | 85.6       | 77.3  | 76.9  | 77.9  | 83.1        | 91.5        |
| Hazelnut   | <b>100</b>  | <b>100</b>   | 99.4       | 96.5  | 91.8  | 94.2  | 99.8        | 96.5        |
| Leather    | <b>100</b>  | <b>100</b>   | <b>100</b> | 98.7  | 97.2  | 97.2  | <b>100</b>  | <b>100</b>  |
| Meta Nut   | 96.8        | 97.9         | 92.3       | 68.9  | 61.3  | 65.6  | 95.1        | <b>98.3</b> |
| Pill       | 90.1        | <b>91.1</b>  | 88.9       | 63.9  | 64.2  | 63.6  | 89.6        | 80.6        |
| Screw      | 79.4        | 80.1         | 65.4       | 56.4  | 55.9  | 59.3  | 74.1        | 63.4        |
| Tile       | 99.3        | <b>100</b>   | 99.8       | 91.8  | 91.2  | 91.2  | <b>100</b>  | 97.4        |
| Toothbrush | 94.6        | 95.1         | 88.9       | 82.9  | 82.3  | 77.9  | 96.8        | <b>98.5</b> |
| Transistor | 98.2        | <b>99.2</b>  | 96.2       | 58.9  | 84.6  | 81.2  | 98.9        | 93.4        |
| Wood       | 98.7        | 98.9         | 98.9       | 61.3  | 95.8  | 95.6  | 97.5        | <b>99.4</b> |
| Zipper     | 99.0        | <b>99.2</b>  | 94.5       | 62.5  | 57.2  | 58.9  | 98.4        | 94.0        |
| Average    | 95.41       | <b>95.92</b> | 90.93      | 75.34 | 77.63 | 78.46 | 94.31       | 91.21       |

Table 8: Setting: New Fewshot Setting, K (number of shot)=8, Dataset: MVTec, Sampling Ratio: 0.01, Metrics: Pixel AUROC

| Category   | Aug.(R)     | GraphCore    | CFA   | SPADE | STPM  | RD4AD | PatchCore   | RegAD       |
|------------|-------------|--------------|-------|-------|-------|-------|-------------|-------------|
| Bottle     | 98.6        | <b>99.8</b>  | 93.6  | 87.1  | 85.2  | 82.1  | 98.7        | 97.5        |
| Cable      | 97.0        | 97.2         | 89.2  | 78.9  | 53.3  | 68.2  | <b>98.3</b> | 94.9        |
| Capsule    | 98.3        | <b>98.5</b>  | 86.5  | 80.2  | 59.3  | 78.5  | 98.4        | 98.2        |
| Carpet     | 99.1        | <b>99.7</b>  | 98.4  | 95.1  | 60.7  | 79.2  | 99.2        | 98.9        |
| Grid       | 82.5        | 83.7         | 82.8  | 77.2  | 61.8  | 76.9  | 71.5        | <b>88.7</b> |
| Hazelnut   | 98.4        | <b>99.2</b>  | 98.6  | 89.5  | 74.9  | 65.5  | 97.2        | 98.5        |
| Leather    | 99.4        | <b>99.6</b>  | 99.4  | 90.2  | 75.3  | 86.9  | 99.4        | 98.9        |
| Meta Nut   | 97.3        | <b>98.9</b>  | 89.9  | 60.5  | 54.6  | 69.5  | 97.5        | 96.9        |
| Pill       | 98.1        | <b>98.4</b>  | 91.7  | 58.2  | 55.7  | 70.5  | 98.1        | 97.8        |
| Screw      | 94.2        | 96.6         | 96.9  | 71.4  | 52.3  | 61.9  | 92.5        | <b>97.1</b> |
| Tile       | 96.8        | <b>97.4</b>  | 83.4  | 82.5  | 58.9  | 60.8  | 96.3        | 95.2        |
| Toothbrush | <b>99.2</b> | <b>99.2</b>  | 94.5  | 77.2  | 66.9  | 79.1  | <b>99.2</b> | 98.7        |
| Transistor | 95.2        | <b>99.4</b>  | 81.5  | 74.5  | 58.2  | 67.9  | 95.7        | 96.8        |
| Wood       | 93.8        | <b>99.7</b>  | 92.7  | 90.4  | 49.2  | 94.5  | 93.4        | 94.6        |
| Zipper     | 98.6        | <b>99.7</b>  | 94.9  | 94.2  | 57.8  | 52.8  | 98.6        | 97.4        |
| Average    | 96.43       | <b>97.80</b> | 91.60 | 80.47 | 61.61 | 72.95 | 95.60       | 96.67       |

Table 9: Setting: New Fewshot Setting, K (number of shot)=1, Dataset: MPDD, Sampling Ratio: 0.01, Metrics: Image AUROC

| Category      | Aug.(R)     | GraphCore    | CFA   | SPADE | STPM        | RD4AD | PatchCore | RegAD |
|---------------|-------------|--------------|-------|-------|-------------|-------|-----------|-------|
| Bracket Black | 64.8        | 65.9         | 64.1  | 62.1  | <b>93.2</b> | 91.2  | 58.2      | -     |
| Bracket Brown | 75.0        | <b>76.8</b>  | 65.4  | 59.2  | 59.8        | 58.3  | 70.6      | -     |
| Bracket White | 88.6        | <b>89.2</b>  | 68.2  | 68.2  | 43.2        | 44.7  | 69.3      | -     |
| Connector     | 98.3        | <b>98.7</b>  | 58.5  | 58.5  | 90.5        | 92.5  | 59.0      | -     |
| Metal Plate   | <b>99.9</b> | <b>99.9</b>  | 62.1  | 63.2  | 71.2        | 74.3  | 64.1      | -     |
| Tubes         | 76.6        | <b>77.8</b>  | 34.2  | 33.8  | 65.1        | 44.2  | 34.1      | -     |
| Average       | 83.87       | <b>84.72</b> | 58.75 | 57.50 | 59.20       | 67.53 | 59.22     | 57.8  |

Table 10: Setting: New Fewshot Setting, K (number of shot)=1, Dataset: MPDD, Sampling Ratio: 0.01, Metrics: Pixel AUROC

| Category      | Aug.(R) | GraphCore    | CFA   | SPADE | STPM  | RD4AD | PatchCore | RegAD |
|---------------|---------|--------------|-------|-------|-------|-------|-----------|-------|
| Bracket Black | 91.7    | <b>92.3</b>  | 75.2  | 72.4  | 74.5  | 72.5  | 78.8      | -     |
| Bracket Brown | 91.8    | <b>92.2</b>  | 77.2  | 71.8  | 72.9  | 72.3  | 76.8      | -     |
| Bracket White | 97.0    | <b>97.3</b>  | 69.8  | 65.4  | 63.1  | 61.3  | 67.8      | -     |
| Connector     | 97.0    | <b>97.5</b>  | 88.9  | 82.4  | 82.1  | 81.7  | 85.0      | -     |
| Metal Plate   | 98.1    | <b>98.9</b>  | 83.1  | 75.2  | 83.2  | 75.4  | 84.1      | -     |
| Tubes         | 92.4    | <b>92.8</b>  | 71.7  | 76.2  | 74.5  | 76.1  | 78.2      | -     |
| Average       | 94.67   | <b>95.17</b> | 77.65 | 73.90 | 75.05 | 73.22 | 78.45     | -     |

Table 11: Setting: New Fewshot Setting, K (number of shot)=2, Dataset: MPDD, Sampling Ratio: 0.01, Metrics: Image AUROC

| Category      | Aug.(R)     | GraphCore    | CFA   | SPADE | STPM        | RD4AD | PatchCore | RegAD |
|---------------|-------------|--------------|-------|-------|-------------|-------|-----------|-------|
| Bracket Black | 66.8        | 67.0         | 54.3  | 62.4  | <b>94.5</b> | 91.7  | 58.6      | 63.3  |
| Bracket Brown | 76.1        | <b>77.2</b>  | 66.8  | 59.5  | 62.3        | 58.8  | 70.7      | 59.4  |
| Bracket White | 87.2        | <b>89.4</b>  | 68.7  | 67.2  | 53.8        | 55.6  | 70.4      | 55.6  |
| Connector     | 98.6        | <b>98.9</b>  | 58.5  | 59.2  | 51.6        | 53.7  | 59.2      | 73.0  |
| Metal Plate   | <b>99.9</b> | <b>99.9</b>  | 62.7  | 64.2  | 62.4        | 65.2  | 64.1      | 61.7  |
| Tubes         | 79.2        | <b>79.8</b>  | 40.7  | 35.6  | 49.6        | 45.9  | 34.3      | 67.1  |
| Average       | 84.63       | <b>85.37</b> | 58.62 | 58.02 | 62.37       | 61.82 | 59.55     | 63.35 |

Table 12: Setting: New Fewshot Setting, K (number of shot)=2, Dataset: MPDD, Sampling Ratio: 0.01, Metrics: Pixel AUROC

| Category      | Aug.(R) | GraphCore    | CFA   | SPADE | STPM  | RD4AD | PatchCore | RegAD |
|---------------|---------|--------------|-------|-------|-------|-------|-----------|-------|
| Bracket Black | 92.1    | <b>92.5</b>  | 75.8  | 72.8  | 75.1  | 75.4  | 78.9      | -     |
| Bracket Brown | 91.9    | <b>92.6</b>  | 77.5  | 71.9  | 73.2  | 73.4  | 76.9      | -     |
| Bracket White | 97.1    | <b>97.5</b>  | 70.8  | 72.4  | 64.2  | 62.4  | 68.1      | -     |
| Connector     | 97.2    | <b>97.7</b>  | 88.2  | 82.8  | 83.4  | 82.3  | 85.2      | -     |
| Metal Plate   | 98.4    | <b>99.1</b>  | 84.3  | 75.9  | 83.2  | 76.5  | 86.3      | -     |
| Tubes         | 92.6    | <b>93.1</b>  | 72.8  | 76.8  | 75.6  | 77.1  | 79.5      | -     |
| Average       | 94.88   | <b>95.42</b> | 78.23 | 75.43 | 75.78 | 74.52 | 79.15     | 93.2  |

Table 13: Setting: New Fewshot Setting, K (number of shot)=4, Dataset: MPDD, Sampling Ratio: 0.01, Metrics: Image AUROC

| Category      | Aug.(R)     | GraphCore    | CFA   | SPADE | STPM        | RD4AD | PatchCore | RegAD |
|---------------|-------------|--------------|-------|-------|-------------|-------|-----------|-------|
| Bracket Black | 66.9        | 67.8         | 54.9  | 62.4  | <b>94.5</b> | 91.9  | 58.9      | 63.8  |
| Bracket Brown | 76.5        | <b>77.8</b>  | 66.8  | 59.5  | 62.4        | 59.0  | 70.8      | 66.1  |
| Bracket White | 87.5        | <b>89.6</b>  | 71.1  | 67.5  | 54.2        | 55.7  | 70.7      | 59.3  |
| Connector     | <b>98.9</b> | <b>98.9</b>  | 58.7  | 59.5  | 52.1        | 54.4  | 59.4      | 77.2  |
| Metal Plate   | <b>99.9</b> | <b>99.9</b>  | 62.9  | 64.9  | 62.4        | 65.5  | 64.4      | 78.6  |
| Tubes         | 79.6        | <b>80.0</b>  | 41.1  | 35.9  | 50.2        | 46.2  | 34.5      | 67.5  |
| Average       | 84.88       | <b>85.67</b> | 59.25 | 58.28 | 62.62       | 62.12 | 59.78     | 68.75 |

Table 14: Setting: New Fewshot Setting, K (number of shot)=4, Dataset: MPDD, Sampling Ratio: 0.01, Metrics: Pixel AUROC

| Category      | Aug.(R)     | GraphCore    | CFA   | SPADE | STPM  | RD4AD | PatchCore | RegAD |
|---------------|-------------|--------------|-------|-------|-------|-------|-----------|-------|
| Bracket Black | <b>92.7</b> | <b>92.7</b>  | 75.9  | 72.9  | 75.3  | 75.9  | 79.1      | -     |
| Bracket Brown | 92.1        | <b>92.9</b>  | 77.9  | 72.3  | 73.5  | 74.8  | 77.3      | -     |
| Bracket White | 97.5        | <b>97.8</b>  | 71.2  | 72.9  | 64.7  | 64.5  | 69.3      | -     |
| Connector     | 97.5        | <b>98.1</b>  | 88.8  | 82.9  | 84.2  | 82.4  | 86.4      | -     |
| Metal Plate   | 98.5        | <b>99.2</b>  | 84.8  | 76.9  | 83.5  | 77.2  | 86.7      | -     |
| Tubes         | 92.7        | <b>93.5</b>  | 73.5  | 77.2  | 75.8  | 78.1  | 80.1      | -     |
| Average       | 95.17       | <b>95.70</b> | 78.68 | 75.85 | 76.17 | 75.48 | 79.82     | 93.9  |

Table 15: Setting: New Fewshot Setting, K (number of shot)=8, Dataset: MPDD, Sampling Ratio: 0.01, Metrics: Image AUROC

| Category      | Aug.(R)     | GraphCore    | CFA   | SPADE | STPM        | RD4AD | PatchCore | RegAD |
|---------------|-------------|--------------|-------|-------|-------------|-------|-----------|-------|
| Bracket Black | 67.1        | 68.2         | 55.2  | 62.4  | <b>94.6</b> | 92.2  | 59.2      | 67.3  |
| Bracket Brown | 76.8        | <b>78.5</b>  | 66.9  | 59.8  | 62.7        | 59.2  | 70.9      | 69.5  |
| Bracket White | 87.9        | <b>89.9</b>  | 79.4  | 67.6  | 54.7        | 55.9  | 70.5      | 61.4  |
| Connector     | 98.9        | <b>99.1</b>  | 58.9  | 59.9  | 52.7        | 54.6  | 59.6      | 84.9  |
| Metal Plate   | <b>99.9</b> | <b>99.9</b>  | 63.1  | 65.2  | 63.2        | 65.8  | 64.7      | 80.2  |
| Tubes         | 79.8        | <b>80.3</b>  | 41.7  | 36.2  | 50.8        | 46.7  | 34.8      | 67.9  |
| Average       | 85.07       | <b>85.98</b> | 60.87 | 58.52 | 63.12       | 62.40 | 59.95     | 71.87 |

Table 16: Setting: New Fewshot Setting, K (number of shot)=8, Dataset: MPDD, Sampling Ratio: 0.01, Metrics: Pixel AUROC

| Category      | Aug.(R) | GraphCore    | CFA   | SPADE | STPM  | RD4AD | PatchCore | RegAD |
|---------------|---------|--------------|-------|-------|-------|-------|-----------|-------|
| Bracket Black | 92.9    | <b>92.9</b>  | 76.2  | 73.1  | 76.3  | 76.2  | 79.6      | -     |
| Bracket Brown | 92.3    | <b>93.1</b>  | 77.9  | 72.6  | 74.2  | 75.1  | 77.5      | -     |
| Bracket White | 97.9    | <b>98.2</b>  | 71.8  | 73.1  | 64.9  | 64.6  | 70.2      | -     |
| Connector     | 98.1    | <b>98.3</b>  | 89.1  | 83.1  | 84.5  | 82.6  | 87.1      | -     |
| Metal Plate   | 98.7    | <b>99.3</b>  | 85.2  | 77.2  | 83.7  | 77.5  | 86.9      | -     |
| Tubes         | 92.9    | <b>93.4</b>  | 73.9  | 78.1  | 76.1  | 78.3  | 80.5      | -     |
| Average       | 95.47   | <b>95.87</b> | 79.02 | 76.20 | 76.62 | 75.72 | 80.30     | 95.10 |

Table 17: The architecture details of GraphCore

| Stage      | Output Size                        | GraphCore                                                 |
|------------|------------------------------------|-----------------------------------------------------------|
| Stem       | $\frac{H}{4} \times \frac{W}{4}$   | Conv $\times 3$                                           |
| Stage 1    | $\frac{H}{4} \times \frac{W}{4}$   | $\begin{bmatrix} D = 48 \\ K = 9 \end{bmatrix} \times 2$  |
| Downsample | $\frac{H}{8} \times \frac{W}{8}$   | Conv                                                      |
| Stage 2    | $\frac{H}{8} \times \frac{W}{8}$   | $\begin{bmatrix} D = 96 \\ K = 9 \end{bmatrix} \times 2$  |
| Downsample | $\frac{H}{16} \times \frac{W}{16}$ | Conv                                                      |
| Stage 3    | $\frac{H}{16} \times \frac{W}{16}$ | $\begin{bmatrix} D = 240 \\ K = 9 \end{bmatrix} \times 2$ |
| Downsample | $\frac{H}{32} \times \frac{W}{32}$ | Conv                                                      |
| Stage 4    | $\frac{H}{32} \times \frac{W}{32}$ | $\begin{bmatrix} D = 384 \\ K = 9 \end{bmatrix} \times 2$ |
| Head       | $1 \times 1$                       | Pooling and MLP                                           |

Table 18: Ablation study for memory bank size and inference speed with respect to 1 shot

| Method              | Memory Bank Size (Average) | Inference speed (Average) |
|---------------------|----------------------------|---------------------------|
| PatchCore           | 1.6M                       | 0.0316s                   |
| Aug.(R) + PatchCore | 1.8M                       | 0.0325s                   |
| GraphCore           | 1.2M                       | 0.0299s                   |

Table 19: Ablation study for memory bank size and inference speed with respect to 2 shot

| Method              | Memory Bank Size (Average) | Inference speed (Average) |
|---------------------|----------------------------|---------------------------|
| PatchCore           | 3.2M                       | 0.0327s                   |
| Aug.(R) + PatchCore | 3.2M                       | 0.0327s                   |
| GraphCore           | 1.8M                       | 0.0287s                   |

Table 20: Ablation study with respect to Dataset: MVTec 2D, sampling rate: 0.01, Metrics: image-level AUROC, number of shot is 1.

| Augmentation Type | Aug + PatchCore |
|-------------------|-----------------|
| Flipping          | 81.4            |
| Translation       | 83.6            |
| Scaling           | 82.3            |
| Rotation          | 87.4            |

Table 21: Ablation study with respect to Dataset: MVTec 2D, sampling rate: 0.01, Metrics: image-level AUROC, number of shot is 2.

| Augmentation Type | Aug + PatchCore |
|-------------------|-----------------|
| Flipping          | 83.7            |
| Translation       | 85.6            |
| Scaling           | 90.2            |
| Rotation          | 90.5            |
